# Supplementary material for: Rabies Virus Seroprevalence among Dogs in Limpopo National Park and the Phylogenetic Analyses of Rabies Viruses in Mozambique
Source: MDPI journal article supplement (doi:10.3390/pathogens11091043), 2022-09-14
Supplement: s1 [file s1]

**Table S1.** Details of the sample size of the canine population covered in this study.

| Village    | Total number of dogs per selected village* | Intended sample size per stratum | Sample size retrieved per stratum |
|------------|--------------------------------------------|----------------------------------|-----------------------------------|
| Bingo      | 63                                         | 37                               | 64                                |
| Macaringue | 126                                        | 74                               | 51                                |
| Munhamane  | 56                                         | 33                               | 44                                |
| Madingane  | 81                                         | 47                               | 51                                |
| Malhaule   | 57                                         | 33                               | 33                                |
| Machamba   | 64                                         | 37                               | 75                                |
| Cunze      | 63                                         | 37                               | 52                                |
| Mavoze     | 147                                        | 86                               | 48                                |
| Total      | 657                                        | 384                              | 418                               |

\* Source: [65]

**Table S2.** Rabies virus sequences used for partial N gene phylogenetic analysis

| Virus#   | Host Species of origin | Year of Collection | Country of origin | Lineage   | Genbank Accession Number |
|----------|------------------------|--------------------|-------------------|-----------|--------------------------|
| 343/18   | Canine                 | 2018               | Mozambique        | Africa 1b | MW248383                 |
| 368/18   | Canine                 | 2018               | Mozambique        | Africa 1b | MW248384                 |
| 393/18   | Feline                 | 2018               | Mozambique        | Africa 1b | MW248385                 |
| 468/17   | Canine                 | 2017               | Mozambique        | Africa 1b | MW248386                 |
| 124/18   | Canine                 | 2018               | Mozambique        | Africa 1b | MW248387                 |
| UPV130   | Canine                 | 2008               | RSA               | Africa 1b | JF747614                 |
| 10_509   | Canine                 | 2010               | RSA               | Africa 1b | KJ744304                 |
| UPV150   | Canine                 | 2007               | RSA               | Africa 1b | JF747615                 |
| 10_274   | Canine                 | 2010               | RSA               | Africa 1b | KJ744308                 |
| 10_387   | Canine                 | 2010               | RSA               | Africa 1b | KJ744303                 |
| 11_300   | Canine                 | 2011               | RSA               | Africa 1b | KJ744307                 |
| 10_268   | Canine                 | 2010               | RSA               | Africa 1b | KJ744302                 |
| 10_458   | Caprine                | 2010               | RSA               | Africa 1b | KJ744309                 |
| UPV153   | Canine                 | 2007               | RSA               | Africa 1b | JF747616                 |
| 11_217   | Canine                 | 2011               | RSA               | Africa 1b | KJ744310                 |
| 8721AFS  | Human                  | 2008               | RSA               | Africa 1b | U22633                   |
| UPV128   | Canine                 | 2008               | RSA               | Africa 1b | JF747613                 |
| UPV167   | Canine                 | 2007               | RSA               | Africa 1b | JF747617                 |
| 11_185   | Canine                 | 2011               | RSA               | Africa 1b | KJ744305                 |
| 9137ALG  | Canine                 | 1982               | Algeria           | Africa 1a | U22643                   |
| 87012MAR | Canine                 | 1986               | Morocco           | Africa 1a | U22631                   |
| 9107MAR  | Human                  | 1990               | Morocco           | Africa 1a | U22852                   |
| 8693GAB  | Canine                 | 1986               | Gabon             | Africa 1a | U22629                   |
| 8698GAB  | Canine                 | 1986               | Gabon             | Africa 1a | U22630                   |
| 86031MOZ | Mouse                  | 1986               | Mozambique        | Africa 1b | KX148203                 |
| 8631MOZ  | Canine                 | 1986               | Mozambique        | Africa 1b | U22484                   |
| RV2775.1 | Canine                 | 2010               | Tanzania          | Africa 1b | KR906747                 |
| RV2780.1 | Canine                 | 2011               | Tanzania          | Africa 1b | KR906751                 |

|                     |                    |      |            |              |          |
|---------------------|--------------------|------|------------|--------------|----------|
| 34312               | Canine             | 2012 | RSA        | Africa 1b    | KT336437 |
| 21467               | Canine             | 1993 | Zimbabwe   | Africa 1b    | KT336435 |
| 8697BEN             | Canine             | 1995 | Benin      | Africa 2     | U22485   |
| 8660GUI             | Canine             | 1986 | Guinea     | Africa 2     | U22487   |
| 9218TCH             | Canine             | 1992 | Chad       | Africa 2     | U22644   |
| 8801CAM             | Canine             | 1987 | Cameroon   | Africa 2     | U22634   |
| 8692EGY             | Human              | 1979 | Egypt      | Africa 4     | U22627   |
| 32/02               | Yellow<br>Mongoose | 2002 | RSA        | Africa 3     | FJ392371 |
| 57-06               | Yellow<br>Mongoose | 2006 | RSA        | Africa 3     | JQ692990 |
| dog/S2/1999         | Canine             | 1999 | Egypt      | Africa 4     | DQ837462 |
| dog/S3/1999         | Canine             | 1999 | Egypt      | Africa 4     | DQ837463 |
| 9126MEX             | Canine             | 1991 | Mexico     | America<br>1 | U22477   |
| DgNYKprws<br>ky1950 | Canine             | 1950 | USA        | America      | FJ228535 |
| 8738THA             | Human              | 1983 | Thailand   | Asia         | U22653   |
| SPU94.06            | Human              | 2006 | RSA        | outgroup     | DQ676932 |
| Aravan              | Myotis blythii     | 2002 | Kyrgyzstan | outgroup     | AB094438 |

**Table S3.** Rabies virus sequences used for G gene phylogenetic analysis.

| <b>Virus #</b> | <b>Host Species</b> | <b>Year of Collection</b> | <b>Country/Province</b> | <b>Genbank Accession Number</b> |
|----------------|---------------------|---------------------------|-------------------------|---------------------------------|
| 124/18         | Canine              | 2018                      | Mozambique<br>(Maputo)  | MW349549                        |
| 368/18         | Canine              | 2018                      | Mozambique<br>(Nampula) | MW349550                        |
| 343/18         | Canine              | 2018                      | Mozambique (Gaza)       | MW377781                        |
| 393/18         | Feline              | 2018                      | Mozambique (Sofala)     | MW377782                        |
| 468/17         | Canine              | 2017                      | Mozambique (Gaza)       | MW377783                        |
| 22547          | Canine              | 1994                      | Zimbabwe                | AF177070                        |
| 332            | Canine              | 1997                      | RSA                     | AF303069                        |
| 29103          | Canine              | 2003                      | Mutare, Zimbabwe        | AY604993                        |
| 29406          | Feline              | 2003                      | Glendale, Zimbabwe      | AY604997                        |
| 29175          | Human               | 2003                      | Rusape, Zimbabwe        | AY605013                        |
| 28460          | Canine              | 2002                      | Mutoko, Zimbabwe        | AY605034                        |
| 204/14         | Canine              | 2014                      | Zimbabwe                | MF425797                        |
| 35/00          | Canine              | 2000                      | RSA                     | EF686077                        |
| 333/06         | Canine              | 2006                      | RSA                     | EU123929                        |
| 652/08         | Canine              | 2008                      | RSA                     | FJ842726                        |
| 206/07         | Canine              | 2007                      | RSA                     | FJ842744                        |
| 108/00         | Canine              | 2000                      | RSA                     | GQ918285                        |
| 132/92         | Canine              | 1992                      | RSA                     | GQ918300                        |
| 151/86         | Canine              | 1986                      | RSA                     | GQ918318                        |
| 326/86         | Canine              | 1986                      | RSA                     | GQ983472                        |
| 341/88         | Canine              | 1988                      | RSA                     | GQ983477                        |
| 366/84         | Canine              | 1984                      | RSA                     | GQ983482                        |

|             |        |      |            |          |
|-------------|--------|------|------------|----------|
| 298.93      | Canine | 1993 | Mozambique | KM262037 |
| 572.99      | Canine | 1999 | Mozambique | KM262039 |
| 633.00      | Canine | 2000 | Mozambique | KM262040 |
| 315.04      | Canine | 2004 | Mozambique | KM262041 |
| 558.05      | Canine | 2004 | Mozambique | KM262043 |
| 659.05      | Canine | 2005 | Mozambique | KM262044 |
| 482.12      | Canine | 2012 | Mozambique | KM262047 |
| 1018.1<br>2 | Bovine | 2012 | Mozambique | KM262048 |
| 233.13      | Canine | 2013 | Mozambique | KM262049 |
| RV131       | Bat    | 2010 | Zimbabwe   | GU936870 |

---

### Reference

65. Serviços Distritais de Actividades Económicas de Massingir. *Censo Efectivos Animais Pecuários Massingir 2015*; Report No.: N/A. SDAE, Massingir, Mozambique, 2015.
